# Supplementary material for: A highly sensitive silicon nanowire array sensor for joint detection of tumor markers CEA and AFP
Source: Royal Society of Chemistry journal article supplement (doi:10.1039/d2bm00555g), 2022-01-01
Supplement: d2bm00555g1.pdf [file d2bm00555g1.pdf]

The Supporting Information for  
**High sensitivity silicon nanowire array sensor for joint  
detecting the tumor markers CEA and AFP**

Ke Lu<sup>a</sup>, Chaoran Liu<sup>\*a</sup>, Gaofeng Wang<sup>a</sup>, Weihuang Yang<sup>a</sup>, Kai Fan<sup>a</sup>, Serguei Lazarouk<sup>b</sup>,  
Vladimir Labunov<sup>b</sup>, Linxi Dong<sup>\*a</sup>, Dujuan Li<sup>\*a</sup>, Xun Yang<sup>\*c</sup>

<sup>a</sup>Ministry of Education Engineering Research Center of Smart Microsensors and Microsystems,

College of Electronics and Information, Hangzhou Dianzi University, Hangzhou 310018, China

<sup>b</sup>Belarusian State University of Informatics and Radioelectronics, P. Browka 6, 220013 Minsk,

Belarus

<sup>c</sup>School of Electronic and Information Engineering, China West Normal University, Nanchong,

637002, China

\* Corresponding author

E-mail: liucr@hdu.edu.cn (C. R. Liu), yangxunjr@163.com (X. Yang),

donglinxi@hdu.edu.cn (L. X. Dong), and [dujuanli@hdu.edu.cn](mailto:dujuanli@hdu.edu.cn) (D. J. Li)

<sup>1</sup> These authors contributed equally to this work

## S1 Surface hydrophilicity

The contact angle tests using a PZ-200SD Drop Shape Analysis (SINDIN, China) were performed to demonstrate the surface hydrophilicity improvement after the SiNWs-FET surface pretreatment by oxygen ( $O_2$ ) plasma (70 W, 5 minutes). As you can see, the contact angle of the SiNWs-FET sensor surface changed from  $113^\circ$  and  $102^\circ$  to  $65^\circ$  and  $53^\circ$  after oxygen ( $O_2$ ) plasma treatment (Fig. S1(a ~ d)). The decreased contact angle demonstrated that the surface hydrophilicity increased.

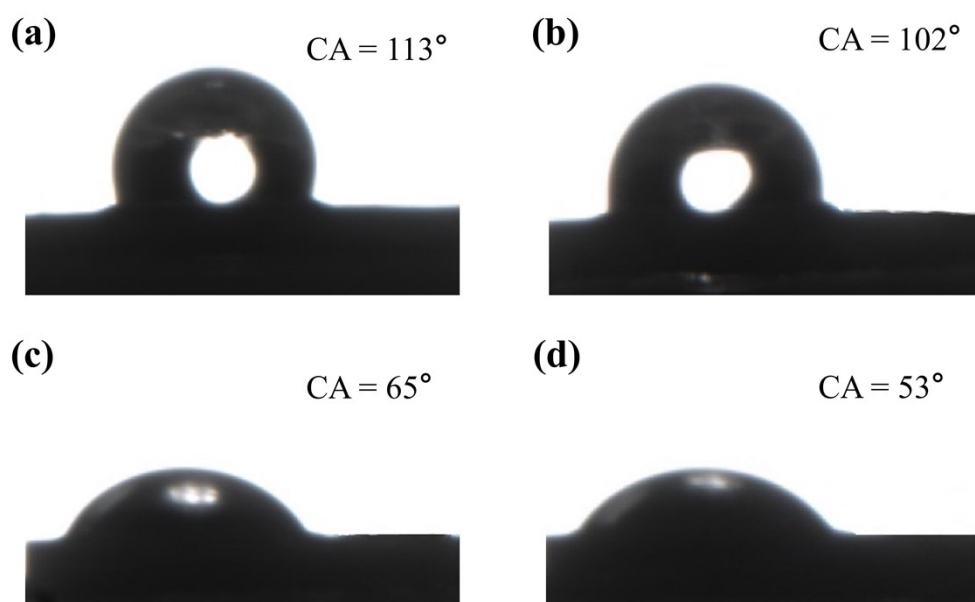

Figure S1. Contact angle of the SiNWs-FET sensor surface before (a, b) and after (c, d) treated with oxygen ( $O_2$ ) plasma.

## S2 Repetitive Linear Range Sensing Measure

To demonstrate the detection performance of the SiNWs array sensor to CEA with different concentrations and AFP with different concentrations, we conducted repetitive related experiments (Fig. S2(a, b)). The results showed that the relative current changes had two highly dependent linear relationships with logarithm of CEA concentration (from 1 fg/ml to 10 pg/ml) and logarithm of AFP concentration (from 0.1 fg/ml to 100 pg/ml).

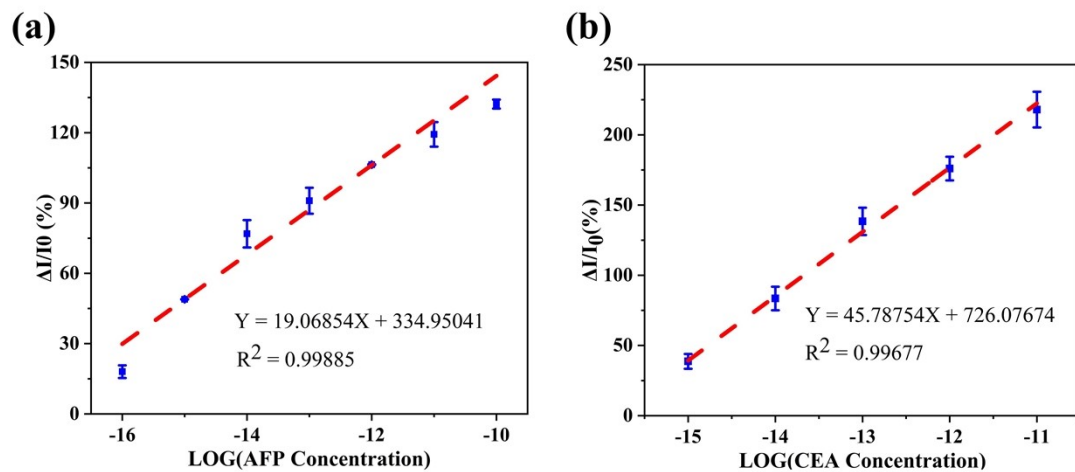

Figure S2. Relative current changes of SiNW-array FET sensor as functions of the logarithm of AFP concentration (a) and the logarithm of CEA concentration (b).

### S3 Repetitive Specificity Sensing Measure

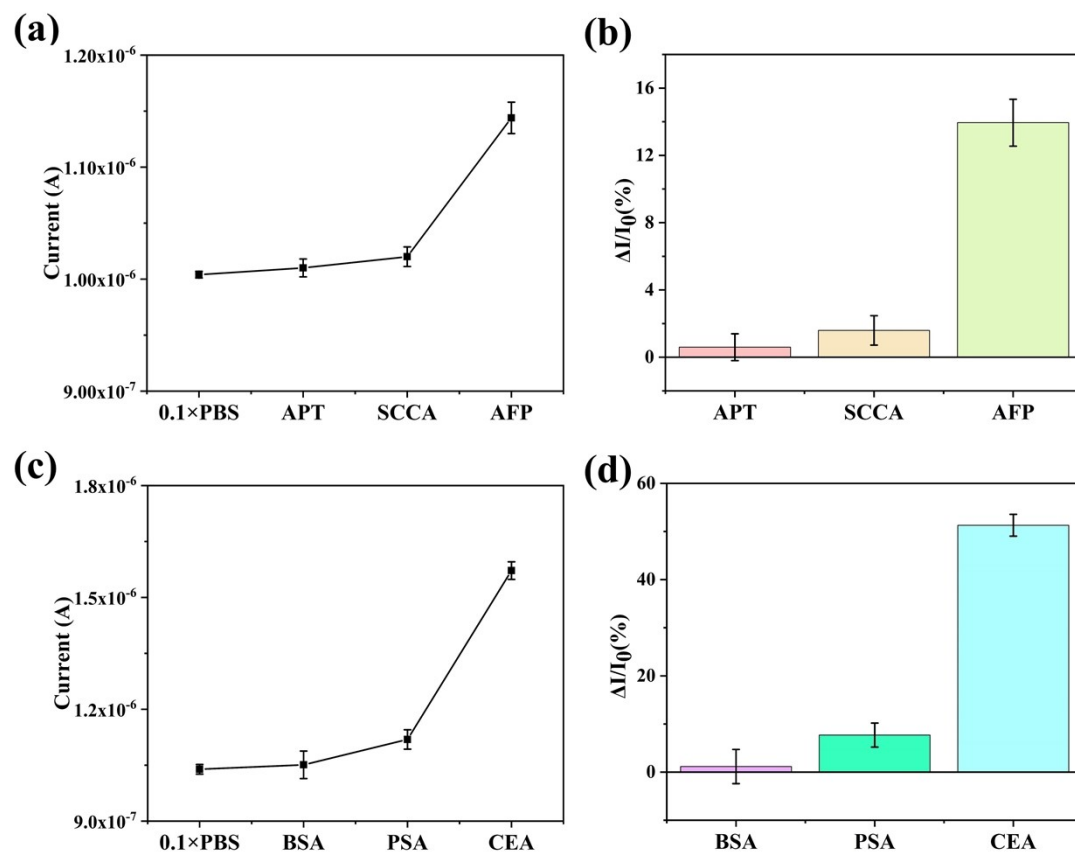

Figure S3. The repetitive specificity sensing measurements of SiNWs-FET sensor. (a) Anti-AFP-Modified SiNWs array detect 0.1 fg/ml AFP, 1  $\mu$ g/ml APT and SCCA. (b) The normalized currents of 0.1 fg/ml AFP, 1  $\mu$ g/ml APT and SCCA. (c) Anti-CEA-Modified SiNWs array detect 1 fg/ml CEA, 10 mg/ml BSA and 100  $\mu$ g/ml PSA. (d) The normalized currents of 1 fg/ml CEA, 10 mg/ml BSA and 100  $\mu$ g/ml PSA.

The sensing measurements are performed by using a Keithley 2450 semiconductor parameter analyzer (Keithley Instruments Inc., Cleveland, OH) to monitor the source-drain current. To demonstrate selectivity of our SiNWs array sensor, high concentrations of interferents and low concentrations of analytes are selected for comparative analysis. Besides, repetitive experiments were also carried out to demonstrate specificity of SiNWs array sensor. When our SiNWs array was modified with AFP / CEA, our sensor had a visible current change to CEA/AFP (Fig. S3(a, c)). Meanwhile, the current changes of interferents were neglectable (Fig. S3(a, c)). The relative current change rate were ~13.944% and ~51.299 respectively (Fig. S3(b, d)), when 0.1 fg/ml AFP and 1 fg/ml CEA were introduced to the SiNWs arrays. Experiment results revealed a superior selectivity of our sensor.

**Table S1. Comparison of detection limit and linea range among various sensors**

| Year | Classification                              | Target | Linear range           | LOD <sup>a</sup> | Ref  |
|------|---------------------------------------------|--------|------------------------|------------------|------|
| 2019 | Nanoclusters sensor                         | AFP    | 10 to 100 nM           | 2.4 nM           | [19] |
| 2022 | Two-size enzyme-linked immunosensor         | AFP    | 20 to 600 ng/ml        | 9.7 ng/ml        | [1]  |
| 2021 | Two-size ELISA sensor                       | AFP    | 6 to 100 ng/ml         | 2 ng/ml          | [2]  |
| 2020 | Electrochemical aptasensor                  | AFP    | 1 ng/ml to 10 µg/mL    | 0.3013 ng/ml     | [3]  |
| 2015 | Photoelectrochemical sensor                 | AFP    | 50 pg/mL to 20 ng/mL   | 20 pg/mL         | [4]  |
| 2020 | SERRS-based lateral flow immunoassay sensor | AFP    | 10 pg/mL to 500 ng/mL  | 9.2 pg/mL        | [5]  |
| 2018 | Electrochemical immunosensor                | AFP    | 3.5 pg/mL to 35 ng/mL  | 0.106 pg/ml      | [6]  |
| 2022 | Electrochemical immunosensor                | AFP    | 100 fg/ml to 200 ng/ml | 18.6 fg/ml       | [7]  |
| 2016 | Optical biosensor                           | AFP    | 10 fg/ml to 10 ng/ml   | 14 aM            | [8]  |
| 2022 | This work                                   | AFP    | 0.1 fg/ml to 100 pg/ml | 0.1 fg/ml        |      |
| 2016 | Electrochemical biosensor                   | AFP    | 0.001 to 10 fg/ml      | 0.0003 fg/ml     | [9]  |
| 2019 | Nanoclusters sensor                         | CEA    | 10 to 100 nM           | 5.6 nM           | [19] |
| 2019 | Chemiluminescence immunoassay sensor        | CEA    | 0.1 to 64 ng/mL        | 85 pg/ml         | [10] |
| 2013 | Chemiluminescence immunoassay sensor        | CEA    | 50 pg/ml to 20 ng/mL   | 34 pg/ml         | [11] |
| 2018 | Fluorescence aptasensor                     | CEA    | 50 pg/ml to 2.0 ng/mL  | 20 pg/ml         | [12] |
| 2019 | “Sense-and-treat” ELISA sensor              | CEA    | 10 to 500 pg/ml        | 10 pg/ml         | [13] |
| 2021 | Photoelectrochemical aptasensor             | CEA    | 100 fg/ml to 10 ng/mL  | 47 fg/ml         | [14] |
| 2018 | Electrochemical immunosensor                | CEA    | 100 fg/ml to 20 ng/mL  | 30 fg/ml         | [15] |
| 2021 | Electrochemical immunosensor                | CEA    | 10 fg/ml to 40 ng/mL   | 3.5 fg/ml        | [16] |
| 2022 | This work                                   | CEA    | 1 fg/ml to 10 pg/ml    | 1 fg/ml          |      |
| 2020 | Electrochemical immunosensor                | CEA    | 1 fg/ml to 100 ng/mL   | 0.8 fg/ml        | [17] |
| 2021 | Fluorescent biosensor                       | CEA    | 1 fg/ml to 100 ng/mL   | 6.76 ag/ml       | [18] |

<sup>a</sup> LOD: limit of detection.

## References

- 1 J. Liu, Y. Jiang, Xi Chen, et al, *Chemical Engineering Journal*, 2022, **436**, 135208.
- 2 J. Liu, D. Cui, Y. Jiang, et al, *International Journal of Biological Macromolecules*, 2021, **166**, 884-892.
- 3 W. Li, M. Chen, J. Liang, et al, *Anal. Methods*, 2020, **12**, 4956-4966.
- 4 X. Yang, J. Lia, J. Fu, et al, *Anal. Methods*, 2015, **7**, 1328-1332.
- 5 L. Lu, J. Yu, X. Liu, et al, *RSC Adv.*, 2020, **10**, 271-281.
- 6 J. Wang, D. Yang, M. Chen, et al, *Anal. Methods*, 2018, **10**, 526-532.
- 7 M. Tan, C. Zhang, Y. Li, et al, *Bioelectrochemistry*, 2022, **145**, 108080.
- 8 N. Jo, K. Lee, Y. Shin, et al, *Biosens. Bioelectron.*, 2016, **81**, 324-333.
- 9 M. Cui, Z. Song, Y. Wu, et al, *Biosens. Bioelectron.*, 2016, **79**, 736-74126.
- 10 Yan. Mao, N. Wang, F. Yu, et al, *Analyst*, 2019, **144**, 4813-4819.
- 11 J. Jiang, S. Zhao, Y. Huang, et al, *Journal of Chromatography A*, 2013, **1282**, 161-166.
- 12 X. Li, W. Sun, J. Wu, et al, *Anal. Methods*, 2018, **10**, 1552-1559.
- 13 H. Yan, L. Jiao, H. Wang, et al, *Sensors and Actuators B: Chemical*, 2019, **297**, 126760.
- 14 N. Zhou, X. Xu, X. Li, et al, *Analyst*, 2021, **146**, 5904-5912.
- 15 Y. Wang, G. Zhao, Y. Zhang, et al, *Sensors and Actuators B: Chemical*, 2018, **266**, 561-569.
- 16 X. Wang, X. Liao, B. Zhang, et al, *Analytica Chimica Acta*, 2021, **1176**, 338757.
- 17 S. Zheng, M. Li, H. Li, et al, *J. Mater. Chem. B*, 2020, **8**, 298-307.
- 18 Y. Ba, J. Zhang, Y. Sun, et al, *New J. Chem.*, 2021, **45**, 3112-3119.
- 19 Y. Jiang, Y. Tang, P. Miao, *Nanoscale*, 2019, **11**, 8119-8123.
